# Supplementary material for: A Common Profile of Disordered Angiogenic Factor Production and the Exacerbation of Inflammation in Early Preeclampsia, Late Preeclampsia, and Intrauterine Growth Restriction
Source: PLoS One. 2016 Oct 19;11(10):e0165060. doi: 10.1371/journal.pone.0165060 (PMC5070778; doi:10.1371/journal.pone.0165060)
Supplement: S1 File — Values of study parameters (sFlt-1, PlGF, IL-6, hsCRP) and weeks of pregnancy in the study groups. (XLSX) [file pone.0165060.s001.xlsx]

## Sheet: IUGR
No	Grupa	SFLT-1 [pg/ml]	PLGF [pg/ml]	SFLT-1/PLGF	IL6 [pg/ml]	hsCRP [mg/ml]	weeks
1	5a	1702	189.5	8.98153	2.568	1.441	39
2	5a	1727	299	5.77592	4.023	1.867	40
3	5a	6443	16.46	391.434	49.28	4.808	38
4	5a	728.5	22.41	32.5078	24.73	5.316	37
5	5a	4861	53.73	90.4709	5.34	5.122	36
6	5a	874.1	24.17	36.1647	16.76	9.585	37
7	5a	15906	38.5	413.143	4.561	4.922	32
8	5a	14206	39.45	360.101	3.173	1.995	31
9	5a	2932	383.7	7.64139	5.846	11.28	38
10	5a	17497	40.56	431.386	9.538	1.253	35
11	5a	3288	367.8	8.93964	5.846	18.97	39
12	5a	10839	54.19	200.018	11.79	22.15	36
13	5a	3266	105.6	30.928	4.561	7.804	36
14	5a	2224	68.33	32.5479	5.083	1.043	41
15	5a				9.048	18.75	38
16	5a	7361	41.76	176.269	4.295	1.659	38
17	5a	9338	36.82	253.612	4.561	12.51	32
18	5a	16827	31.01	542.631	8.069	17.51	36
19	5a	2518	56.66	44.4405	5.083	6.514	27
20	5a	13988	121.6	115.033	5.846	2.734	35
21	5a	3231	83.82	38.5469	3.746	2.47	33
22	5a	4747	62.73	75.6735	4.561	1.639	39
23	5a	8164	49.74	164.133	2.255	15.74	38
24	5a	7787	282.9	27.5256	9.538	18.07	33
25	5a	12438	31.12	399.679	4.824	1.275	37
26	5a	1343	95.86	14.01	3.78	21.48	35
27	5a	2510	782.4	3.20808	2.568	1.801	25
28	5a	1154	1706	0.676436	3.746	6.791	38
29	5a	2123	2155	0.985151	2.875	16.39	34
30	5a	12251	127.4	96.1617	0.6553	16.41	33
31	5a	3968	29.19	135.937	6.594	9.984	35
32	5a	8354	75.21	111.076	6.841	16.25	32
33	5a	1332	86.63	15.3757	5.594	14.78	40
34	5a	5015	51.57	97.2465	7.34	10.43	30
35	5a	1978	47.73	41.4414	3.56	6.54	22
36	5a	2562	50.57	50.6624	4.54	7.68	38
37	5a	5958	91.13	65.3791	3.34	5.32	34
38	5a	8072	113.8	70.9315	8.71	15.23	38
39	5a	3200	32.1	99.6885	2.26	9.4	38
40	5a	3325	50.17	66.2747	6.72	4.65	31
41	5a	5583	146.1	38.2136	5.62	3.12	35

## Sheet: early
No	Grupa	SFLT-1 [pg/ml]	PLGF [pg/ml]	SFLT-1/PLGF	IL6 [pg/ml]	hsCRP [mg/ml]	weeks
1	3a	1009	15.05	67.0432	12.9	6.54237	30
2	3a	11653	23.91	487.369	4.084	11.9774	32
3	3a	9921	13.74	722.052	3.594	10.6723	27
4	3a	11944	18.1	659.89	7.758	9.78531	32
5	3a	8188	8.08	1013.37	3.594	6.06215	29
6	3a	24149	46.07	524.181	8.493	5.15254	29
7	3a	17410	37.04	470.032	3.594	6.55367	33
8	3a	18556	10.74	1727.75	7.758	1.49153	27
9	3a	2901	24.87	116.647	18.78	3.33898	26
10	3a	2289	21.58	106.07	20.98	5.0452	28
11	3a	15995	23.89	669.527	10.45	10.2938	31
12	3a	8297	11.4	727.807	4.098	10.1864	28
13	3a	7302	18.16	402.093	12.614	1.87006	31
14	3a	8826	12.93	682.599	8.493	3.57627	32
15	3a	7696	87.59	87.8639	12.859	5.48588	32
16	3a	18303	31.23	586.071	5.064	4.25989	33
17	3a	16170	19.43	832.218	5.553	2.68362	30
18	3a	12070	32.1	376.012	15.064	5.41243	30
19	3a	8346	15.15	550.891	2.614	10.7853	32
20	3a	1854	11.02	168.24	4.084	12.9718	30
21	3a	10987	7.88	1394.29	10.45	4.63277	26
22	3a	10224	25.75	397.049	15.21	7.43	32
23	3a	10292	45.73	225.06	4.14	3.67	27
24	3a	6898	39.72	173.666	4.87	2.67	33
25	3a	10473	18.86	555.302	8.43	10.34	27
26	3a	6776	17.1	396.257	3.76	6.94	33
27	3a	16569	15.67	1057.37	9.98	5.21	32
28	3a	15556	40.21	386.869	5.47	3.23	31
29	3a	13480	29.25	460.855	11.43	4.76	29
30	3a	12137	8.6	1411.28	9.54	12.39	28
31	3a	6073	17.47	347.624	7.73	5.32	33
32	3a	7896	29.69	265.948	7.65	3.87	31
33	3a	8826	12.93	682.599	8.71	7.34	33
34	3a	11223	10.86	1033.43	7.11	9.45	28
35	3a	9998	20.54	486.758	5.78	3.62	30
36	3a	12050	43.31	278.227	5.92	3.54	31
37	3a	11919	14.59	816.929	9.41	11.17	28
38	3a	8228	106.9	76.9691	2.57	3.32	33
39	3a	6335	15.16	417.876	7.98	5.42	33
40	3a	13869	12.74	1088.62	9.43	8.98	30
41	3a	6159	29.69	207.444	6.87	5.78	33
42	3a	14785	10.61	1393.5	12.45	11.37	29

## Sheet: late
No	Grupa	SFLT-1 [pg/ml]	PLGF [pg/ml]	SFLT-1/PLGF	IL6 [pg/ml]	hsCRP [mg/ml]	weeks
1	4a	2308	58.89	39.1917	5.594	19.98	37
2	4a	10726	115.8	92.6252	8.069	16.61	35
3	4a	11366	41.52	273.748	25.04	19.92	38
4	4a	1137	16.75	67.8806	13.88	9.765	37
5	4a	17605	42.94	409.991	20.49	19.23	38
6	4a	12414	43.85	283.101	6.778	16.25	38
7	4a	7962	98.77	80.6115	6.8997	8.64972	35
8	4a	2315	209.1	11.0713	6.614	9.39548	38
9	4a	7266	34.47	210.792	1.879	10.3616	36
10	4a	10038	44.71	224.514	6.533	12.9379	37
11	4a	9104	42.89	212.264	1.634	10.6667	40
12	4a	13991	25.94	539.36	43.27	11.2429	37
13	4a	7626	57.08	133.602	10.21	10.452	35
14	4a	27941	79.05	353.46	3.104	5.93785	38
15	4a	11413	97.56	116.984	2.124	10.1582	36
16	4a	4545	55.98	81.1897	4.574	2.35593	37
17	4a	20267	46.45	436.319	4.574	3.70621	38
18	4a	13983	137.4	101.769	4.8149	4.48588	40
19	4a	18768	106	177.057	1.879	6.02825	36
20	4a	2064	135.4	15.2437	16.09	10.1243	38
21	4a	6311	9.32	677.146	28.09	12.0282	34
22	4a	15436	76.27	202.386	2.86	11.65	35
23	4a	15000	68.91	217.675	6.78	10.56	36
24	4a	14254	61.33	232.415	5.43	9.87	36
25	4a	7282	56.7	128.43	8.09	6.78	36
26	4a	13968	66.84	208.977	6.7	5.9	35
27	4a	6073	17.47	347.624	5.97	7.59	34
28	4a	19277	171.1	112.665	6.45	4.32	37
29	4a	9587	97.8	98.0266	5.43	7.54	37
30	4a	10030	66.37	151.122	4.92	8.97	36
31	4a	16440	113.7	144.591	6.78	9.67	35
32	4a	8750	52.31	167.272	18.52	10.12	37
33	4a	8049	36.6	219.918	9.92	12.54	36
34	4a	9058	50.03	181.051	11.43	8.69	38
35	4a	6162	63.69	96.7499	6.3	10.02	40
36	4a	24683	26.43	933.901	23.43	17.56	34
37	4a	4800	52.32	91.7431	4,.97	9.45	39
38	4a	9929	54.63	181.75	5.46	13.32	37
39	4a	16453	146.1	112.615	5.54	6.98	38
40	4a	17471	105.4	165.759	7.5	7.54	36
41	4a	20862	53.03	393.4	16.43	11.43	34

## Sheet: control
No	Grupa	SFLT-1 [pg/ml]	PLGF [pg/ml]	SFLT-1/PLGF	IL6 [pg/ml]	hsCRP [mg/ml]	weeks
1	K	1572	203.6	7.72102	1.938	0.2497	28
2	K	1808	501.3	3.60662	4.295	1.215	25
3	K	1462	635	2.30236	4.561	0.7858	25
4	K	673.7	275.5	2.44537	2.875	1.821	29
5	K	2255	210.9	10.6923	3.463	0.3299	32
6	K	4506	125.1	36.0192	3.746	0.7451	36
7	K	1874	69.39	27.0068	4.295	0.464	38
8	K	610.6	303.2	2.01385	9.784	0.04766	24
9	K	961.1	715.8	1.34269	5.594	0.1816	36
10	K	790.6	414.8	1.90598	1.297	1.425	25
11	K	2336	686.5	3.40277	4.824	0.51	34
12	K	1695	386.6	4.38438	5.594	0.8733	35
13	K	1136	503.6	2.25576	4.295	0.6889	26
14	K	1797	681.1	2.63838	1.38	0.1875	28
15	K	1463	865.1	1.69113	2.875	0.1601	32
16	K	12256	634.3	19.3221	8.313	1.05	40
17	K	2010	817.7	2.45811	2.255	0.1762	31
18	K	1857	825	2.25091	4.023	0.4062	34
19	K	1588	145.1	10.9442	5.594	0.8811	33
20	K	1516	886.1	1.71087	6.594	1.293	29
21	K	1952	318.6	6.1268	2.568	0.1129	37
22	K	1967	361.2	5.44574	4.824	1.273	30
23	K	2052	583.6	3.51611	9.3	2.049	31
24	K	2078	357.3	5.81584	5.34	1.744	32
25	K	1728	491	3.51935	7.426	1.434	31
26	K	4239	79.4	53.3879	4.561	0.1319	39
27	K	2326	143.7	16.1865	4.023	1.312	37
28	K	900.2	335.2	2.68556	5.083	1.161	33
29	K	1185	1486	0.797443	4.561	1.797	30
30	K	863.8	317.1	2.72406	3.746	0.5093	30
31	K	1013	597.9	1.69426	4.561	0.6514	30
32	K	5875	373.3	15.738	7.824	1.722	33
33	K	2353	659.4	3.5684	3.463	0.3112	31
34	K	4252	225	18.8978	6.594	0.186	32
35	K	3528	97.75	36.0921	5.846	0.9506	36
36	K	1405	2942	0.477566	1.618	0.109	32
37	K	2199	496.1	4.43257	4.023	0.1395	27
38	K	1816	604.8	3.00265	4.295	0.222	28
39	K	706.7	316.8	2.23074	2.686	0.1897	39
40	K	870.6	267.3	3.25701	4.824	0.1946	36
41	K	964.8	259.5	3.71792	4.295	0.2128	32
42	K	1945	321.6	6.04789	13.09	0.2405	31
43	K	1173	320.6	3.65876	4.295	0.1444	30
